# Supplementary material for: Swiss glacier mass loss during the 2022 drought: persistent streamflow contributions amid declining melt water volumes
Source: Copernicus journal article supplement (doi:10.5194/hess-30-23-2026), 2026-01-06
Supplement: Supplementary file 1 [file hess-30-23-2026-supplement.pdf]

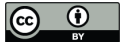

*Supplement of*

## **Swiss glacier mass loss during the 2022 drought: persistent streamflow contributions amid declining melt water volumes**

**Marit van Tiel et al.**

*Correspondence to:* Marit van Tiel ([vantiel@vaw.baug.ethz.ch](mailto:vantiel@vaw.baug.ethz.ch))

The copyright of individual parts of the supplement might differ from the article licence.

## Supplementary Tables and Figures

**Table S1** Overview of the 88 catchments used in the study. Area refers to catchment area. The column "Fig. 3" indicates the catchment that were used in Figure 3, in which the water balance anomalies were calculated, column "Fig. 4" refers to catchments used for calculating a compensation level, column "Fig 5." to catchments used for calculating glacier melt contribution to streamflow, column "Fig 6." to catchments used in the long-term comparison (time-series starting before 1921) and column "Fig 7." to catchments used for comparing streamflow in the year 2003 and 2022, and SI Fig. 6, for Figure 6 of the SI.

| Catchment            | Area<br>[ $km^2$ ] | Glacier<br>cover | Basin | Fig. 3 | Fig.<br>4 | Fig.<br>5 | Fig.<br>6 | Fig.<br>7 | SI<br>Fig.<br>6 |
|----------------------|--------------------|------------------|-------|--------|-----------|-----------|-----------|-----------|-----------------|
| Martina_2067         | 1941.29            | 2.5              | Inn   | x      | x         | x         | x         | x         | x               |
| St-Moritzbad_2105    | 155.39             | 3.7              | Inn   |        |           | x         | x         | x         |                 |
| Pontresina_2256      | 66.53              | 22.3             | Inn   | x      | x         | x         |           | x         |                 |
| Pontresina_2262      | 106.92             | 15.1             | Inn   | x      | x         | x         |           | x         | x               |
| La-Punt-Chamues_2263 | 73.36              | 0.0              | Inn   | x      | x         | x         |           | x         |                 |
| Tarasp_2265          | 1580.76            | 3.0              | Inn   |        |           |           |           | x         |                 |
| S-Chanf_2462         | 615.94             | 6.3              | Inn   |        |           | x         |           | x         |                 |
| Bellinzona_2020      | 1517.49            | 0.2              | Po    | x      | x         | x         | x         | x         | x               |
| Loderio_2086         | 400.23             | 0.3              | Po    |        |           |           | x         | x         |                 |
| Piotta_2364          | 158.88             | 0.4              | Po    |        |           |           |           | x         |                 |
| Maggia_2368          | 926.95             | 0.3              | Po    |        |           |           |           | x         |                 |
| Buseno_2474          | 120.53             | 0.2              | Po    | x      | x         | x         |           | x         |                 |
| Bignasco_2475        | 315.51             | 0.8              | Po    |        |           |           |           | x         |                 |
| Pollegio_2494        | 443.76             | 0.2              | Po    | x      | x         | x         |           | x         |                 |
| Soglio_2620          | 177.36             | 7.1              | Po    |        |           |           |           |           | x               |
| Brugg_2016           | 11681.18           | 1.5              | Rhine | x      | x         | x         | x         | x         |                 |
| Brienzwiler_2019     | 555.15             | 15.3             | Rhine | x      | x         | x         | x         | x         |                 |
| Brügg-Aegerten_2029  | 8248.58            | 2.1              | Rhine | x      | x         | x         | x         | x         |                 |
| Thun_2030            | 2459.26            | 6.9              | Rhine | x      | x         | x         | x         |           |                 |
| Ilanz_2033           | 774.04             | 2.0              | Rhine | x      | x         | x         | x         | x         |                 |
| Seedorf_2056         | 833.20             | 6.7              | Rhine | x      | x         | x         | x         | x         |                 |
| Murgenthal_2063      | 10059.27           | 1.7              | Rhine | x      | x         | x         |           | x         |                 |
| Hagneck_2085         | 5111.84            | 3.4              | Rhine | x      | x         | x         |           | x         |                 |
| Andermatt_2087       | 190.18             | 3.2              | Rhine | x      | x         | x         | x         | x         |                 |
| Luetschine_2109      | 380.66             | 13.4             | Rhine | x      | x         | x         | x         | x         | x               |
| Bern_2135            | 2941.14            | 5.8              | Rhine | x      | x         | x         | x         | x         |                 |
| Tiefencastel_2141    | 529.04             | 0.5              | Rhine |        |           | x         | x         | x         |                 |
| Rekingen_2143        | 14767.35           | 0.2              | Rhine | x      | x         | x         |           | x         |                 |
| Landquart_2150       | 613.74             | 0.8              | Rhine |        |           | x         |           | x         |                 |
| Oberwil_2151         | 343.70             | 2.5              | Rhine | x      | x         | x         |           | x         |                 |
| Broc_2160            | 636.30             | 0.3              | Rhine | x      | x         | x         |           | x         |                 |

**Table S1** Overview of the 88 catchments used in the study. Area refers to catchment area. The column "Fig. 3" indicates the catchment that were used in Figure 3, in which the water balance anomalies were calculated, column "Fig. 4" refers to catchments used for calculating a compensation level, column "Fig 5." to catchments used for calculating glacier melt contribution to streamflow, column "Fig 6." to catchments used in the long-term comparison (time-series starting before 1921) and column "Fig 7." to catchments used for comparing streamflow in the year 2003 and 2022, and SI Fig. 6, for Figure 6 of the SI.

| Catchment               | Area<br>[km <sup>2</sup> ] | Glacier<br>cover | Basin | Fig. 3 | Fig.<br>4 | Fig.<br>5 | Fig.<br>6 | Fig.<br>7 | SI<br>Fig.<br>6 |
|-------------------------|----------------------------|------------------|-------|--------|-----------|-----------|-----------|-----------|-----------------|
| Weisse_Luetschine_2200  | 164.92                     | 13.0             | Rhine | x      | x         | x         |           | x         | x               |
| Untersiggenthal_2205    | 17553.22                   | 1.5              | Rhine | x      | x         | x         | x         | x         |                 |
| Oberried_Lenk_2219      | 34.75                      | 23.4             | Rhine | x      | x         | x         |           | x         |                 |
| Isenthal_2276           | 43.87                      | 7.1              | Rhine | x      | x         | x         |           | x         |                 |
| Neuhausen_2288          | 11929.59                   | 0.3              | Rhine | x      | x         | x         | x         | x         |                 |
| Basel-Rheinhalle_2289   | 35877.83                   | 0.8              | Rhine | x      | x         | x         | x         | x         | x               |
| Davos_2355              | 183.68                     | 0.3              | Rhine | x      | x         | x         |           | x         |                 |
| Mollis_2372             | 600.21                     | 3.0              | Rhine | x      | x         | x         | x         | x         |                 |
| Fürstenaue_2387         | 1576.85                    | 0.6              | Rhine | x      | x         | x         |           | x         |                 |
| Seez_2426               | 106.07                     | 0.1              | Rhine |        |           |           |           | x         |                 |
| Rein_da_Sumvitg_2430    | 21.76                      | 1.5              | Rhine | x      | x         | x         |           | x         |                 |
| Ringgenberg_2457        | 1137.55                    | 12.0             | Rhine | x      | x         | x         |           | x         |                 |
| Diepoldsau_2473         | 6299.20                    | 0.6              | Rhine | x      | x         | x         | x         | x         |                 |
| Buochs_2481             | 227.96                     | 2.7              | Rhine | x      | x         | x         | x         | x         |                 |
| Glenner_2498            | 380.88                     | 1.0              | Rhine | x      | x         | x         |           | x         |                 |
| Domat-Ems_2602          | 3228.55                    | 0.9              | Rhine | x      | x         | x         | x         | x         |                 |
| Hinterrhein_2631        | 41.52                      | 9.4              | Rhine |        |           | x         |           |           |                 |
| Linth_47160303          | 195.61                     | 7.6              | Rhine |        |           | x         |           |           |                 |
| Louibach_A011           | 62.65                      | 3.2              | Rhine | x      | x         | x         |           | x         |                 |
| Aareschlucht_A095       | 453.76                     | 17.1             | Rhine | x      | x         | x         |           |           |                 |
| Kander_A096             | 141.71                     | 15.9             | Rhine | x      | x         | x         |           |           |                 |
| Grindelwald_A112        | 106.74                     | 27.8             | Rhine |        |           | x         |           |           |                 |
| PorteduScex_2009        | 5238.08                    | 11.1             | Rhone | x      | x         | x         | x         | x         | x               |
| Sion_2011               | 3372.39                    | 14.4             | Rhone | x      | x         | x         | x         | x         |                 |
| Branson_2024            | 3727.84                    | 13.2             | Rhone | x      | x         | x         |           | x         |                 |
| Martigny_2053           | 675.65                     | 11.6             | Rhone |        |           |           |           | x         |                 |
| Drance_de_Bagnes_2117   | 253.72                     | 22.1             | Rhone |        |           |           |           | x         |                 |
| Blatten bei Naters_2160 | 195.52                     | 56.4             | Rhone | x      | x         | x         |           | x         |                 |
| Aigle_2203              | 131.59                     | 0.9              | Rhone | x      | x         | x         |           | x         |                 |
| Klusmatten_2244         | 19.44                      | 0.4              | Rhone | x      | x         | x         |           | x         |                 |
| Gletsch_2268            | 39.41                      | 42.8             | Rhone | x      | x         | x         |           | x         | x               |
| Blatten_2269            | 77.37                      | 24.3             | Rhone | x      | x         | x         |           | x         |                 |
| Brig_2342               | 76.52                      | 2.5              | Rhone | x      | x         | x         |           | x         |                 |
| Brig_2346               | 906.06                     | 19.4             | Rhone | x      | x         | x         |           | x         |                 |

**Table S1** Overview of the 88 catchments used in the study. Area refers to catchment area. The column "Fig. 3" indicates the catchment that were used in Figure 3, in which the water balance anomalies were calculated, column "Fig. 4" refers to catchments used for calculating a compensation level, column "Fig 5." to catchments used for calculating glacier melt contribution to streamflow, column "Fig 6." to catchments used in the long-term comparison (time-series starting before 1921) and column "Fig 7." to catchments used for comparing streamflow in the year 2003 and 2022, and SI Fig. 6, for Figure 6 of the SI.

| Catchment             | Area<br>[ $km^2$ ] | Glacier<br>cover | Basin | Fig. 3 | Fig.<br>4 | Fig.<br>5 | Fig.<br>6 | Fig.<br>7 | SI<br>Fig.<br>6 |
|-----------------------|--------------------|------------------|-------|--------|-----------|-----------|-----------|-----------|-----------------|
| Visp_2351             | 785.83             | 23.6             | Rhone |        |           |           |           | x         |                 |
| Reckingen_2419        | 214.25             | 12.0             | Rhone | x      | x         | x         |           | x         |                 |
| Geneve_2606           | 8000.36            | 7.3              | Rhone | x      | x         | x         | x         | x         |                 |
| Oberwald_2607         | 38.59              | 4.4              | Rhone | x      | x         | x         |           | x         |                 |
| Gornera               | 80.50              | 64.8             | Rhone | x      | x         | x         |           | x         |                 |
| Zmuttbach             | 40.81              | 47.1             | Rhone | x      | x         | x         |           | x         |                 |
| Findelbach            | 22.02              | 70.0             | Rhone | x      | x         | x         |           | x         |                 |
| LaBorgne_deFerpecle   | 34.33              | 57.5             | Rhone | x      | x         | x         |           | x         |                 |
| LaBorgne_d'Arolla     | 25.20              | 39.8             | Rhone |        |           | x         |           | x         |                 |
| Reuse_de_Saleinaz     | 19.90              | 44.1             | Rhone |        |           | x         |           | x         |                 |
| Moiry                 | 28.90              | 17.3             | Rhone |        |           | x         |           |           |                 |
| Turtmäna              | 28.00              | 43.3             | Rhone |        |           | x         |           |           |                 |
| LaNavisence           | 76.60              | 30.1             | Rhone |        |           | x         |           |           |                 |
| L'Avancon             | 78.20              | 1.7              | Rhone |        |           | x         |           |           |                 |
| Griessee              | 10.04              | 45.2             | Rhone | x      | x         | x         |           | x         |                 |
| Saaser_Vispa          | 99.54              | 24.5             | Rhone | x      | x         | x         |           | x         |                 |
| Mauvoisin             | 114.46             | 32.4             | Rhone | x      | x         | x         |           | x         |                 |
| Torrent_deCorbassiere | 34.63              | 52.6             | Rhone | x      | x         | x         |           | x         |                 |
| Schweibbach           | 9.55               | 18.9             | Rhone | x      | x         | x         |           |           |                 |
| Furggbach             | 9.06               | 47.7             | Rhone | x      | x         | x         |           | x         |                 |
| Schalibach            | 17.22              | 41.7             | Rhone | x      | x         | x         |           | x         |                 |
| Triftbach             | 11.83              | 40.7             | Rhone | x      | x         | x         |           | x         |                 |
| HautArolla            | 12.88              | 32.3             | Rhone | x      | x         | x         |           | x         |                 |



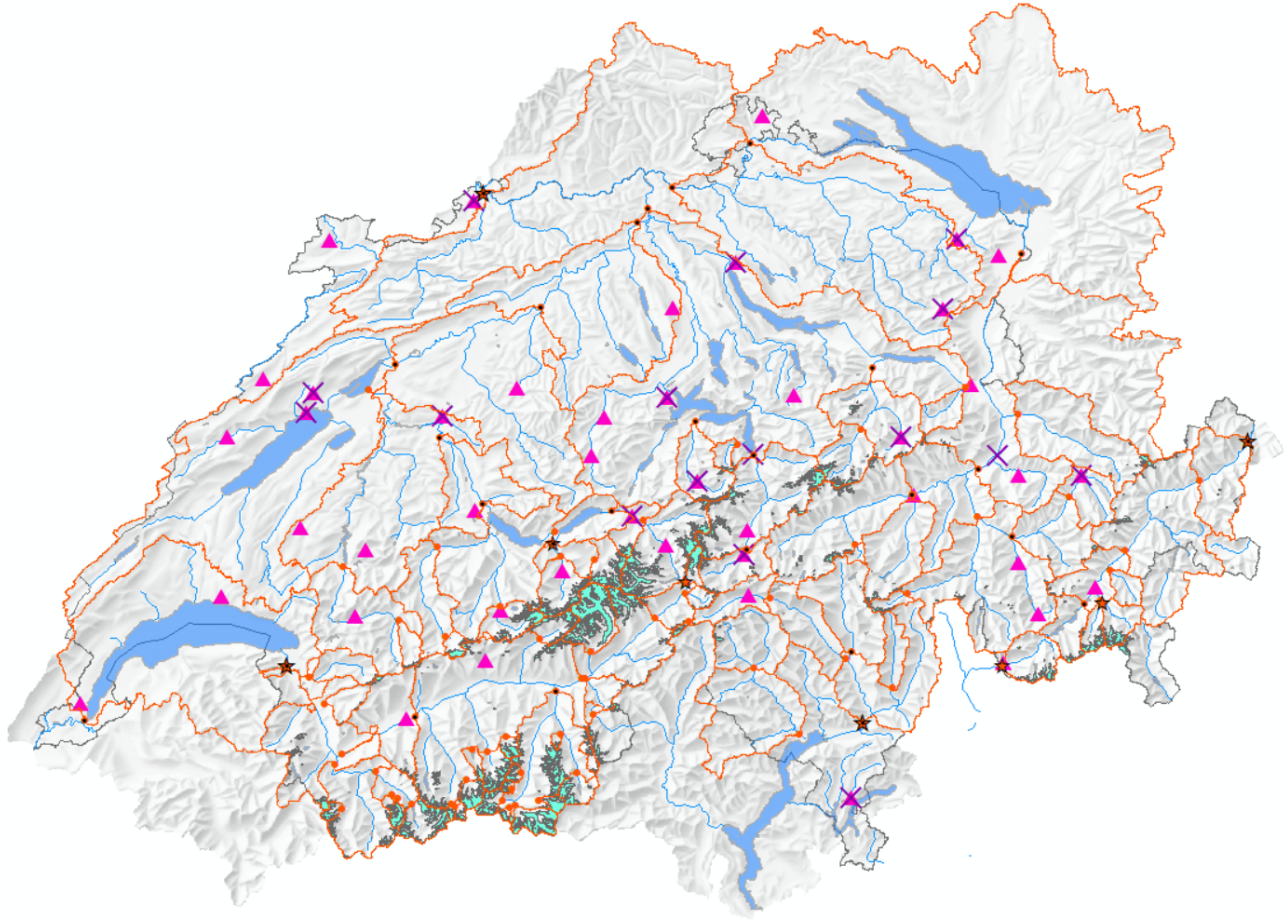

Figure S1: Location of the meteorological stations that were used for the long-term (1900-2022) analyses. Triangles show locations of precipitation measurements, whereas purple crosses show the locations of temperature measurements. The anomalies of these stations were averaged to obtain a Swiss-wide precipitation and temperature anomaly time-series from 1900 to 2022.

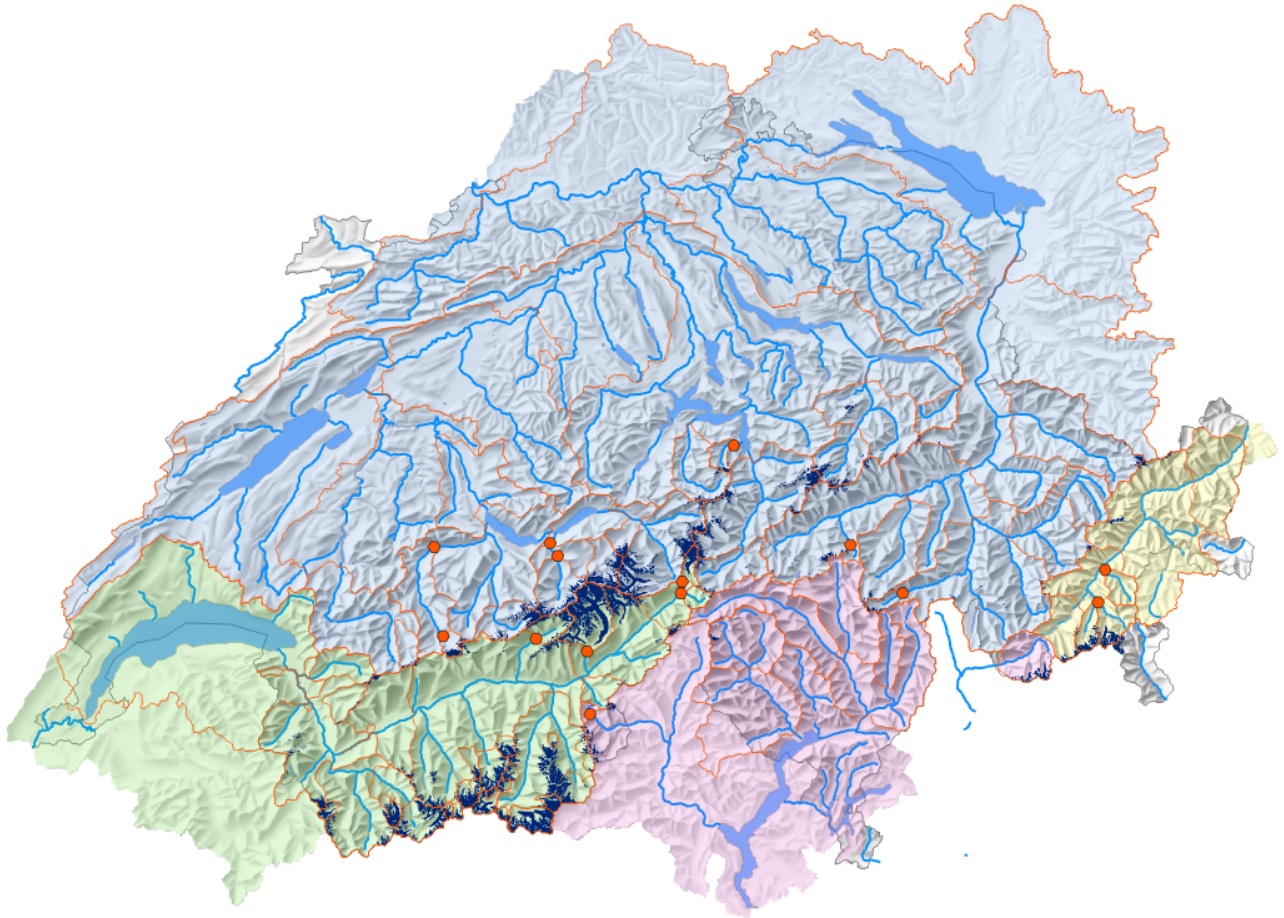

Figure S2: Location of the gauging stations that were classified "natural" due to absence or minimal presence of human influences.

**Table S2** List of glaciers that were used for extrapolating observed annual and winter mass balances in space and for modelling annual daily cumulative mass balance cycles that were consequently also extrapolated in space.

| Glacier                       | Mass balance years                |
|-------------------------------|-----------------------------------|
| Adler                         | 2006-2022                         |
| Vadrec da l’Albigna           | 1955-1961                         |
| Grosser Aletschgletscher      | 1915-2022                         |
| Allalngletscher               | 1956-2022                         |
| BlauSchnee                    | 2007-2018                         |
| Ghiacciaio del Basodino       | 1992-2022                         |
| Chessjengletscher             | 1956-1995                         |
| Claridenfirn                  | 1915-2022                         |
| Glacier de Corbassière        | 1997-2022                         |
| Vadret dal Corvatsch          | 2013-2022                         |
| Findelgletscher               | 2005-2022                         |
| Vadrec del Forno              | 1955-1960                         |
| Glacier du Giéto              | 1967-2022                         |
| Griesgletscher                | 1962-2022                         |
| Hohlaubgletscher              | 1956-2022                         |
| Limmerngletscher              | 1948-1985                         |
| Vadret dal Murtel             | 2014-2022                         |
| Vadret Pers                   | 2002-2022                         |
| Pizolgletscher                | 2007-2021                         |
| Glacier de la Plaine Morte    | 2010-2022                         |
| Plattalva                     | 1948-1985                         |
| Rhonegletscher                | 1885-1909 + 1980-1982 + 2007-2022 |
| Schwarzwasserfirn/Schwarzbach | 2013-2021                         |
| Schwarzberggletscher          | 1956-2022                         |
| Glacier du Sex Rouge          | 2012-2022                         |
| Silvrettagletscher            | 1915-2022                         |
| St. Annafirn                  | 2012-2022                         |
| Glacier de Tsanfleuron        | 2010-2022                         |

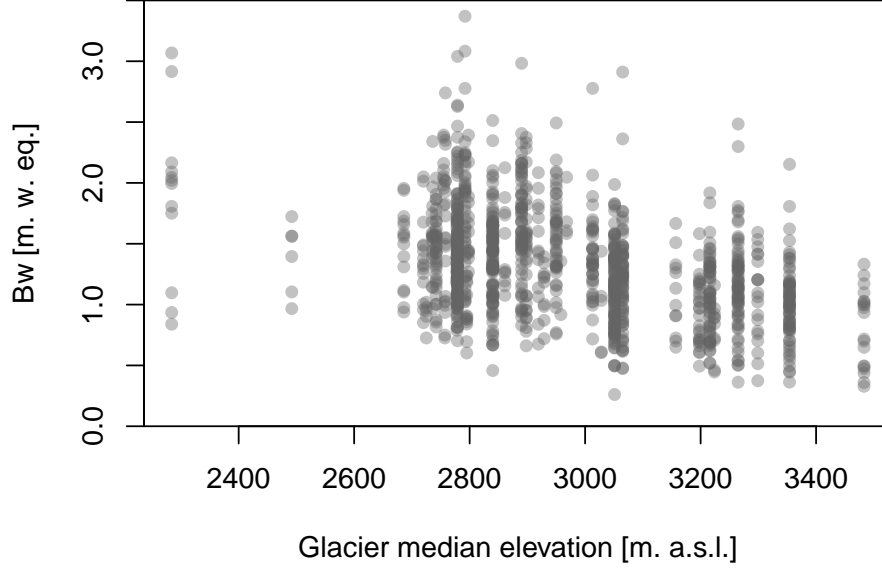

Figure S3: Glacier winter mass balance measurements against their median elevation. Each point represents one glacier and one measurement year. These measurements show that winter mass balance decreases with increasing elevation.

**Table S3** Glacier meltwater volumes and mass balances for 2022 and the reference period (1991-2020).  $M$  refers to meltwater volumes, whereas  $B$  refers to glacier-wide mean specific mass balance.  $a$  refers to net annual,  $s$  to summer and  $w$  to winter. CH/Basin refers to Swiss-wide/Basin average or sum. Strat. refers to the stratigraphic mass balance year; used in the glacier attribution analyses, and fixed to the mass balance year corresponding to the hydrological year; used in all other comparisons and analyses.

|                  |        | <b>2022</b> |        | <b>Reference period</b> |       |
|------------------|--------|-------------|--------|-------------------------|-------|
|                  |        | strat.      | fixed. | strat.                  | fixed |
| $M_a$ [ $km^3$ ] | CH     | 2.63        | 2.58   | 0.79                    | 0.82  |
|                  | Rhine  | 0.76        | 0.73   | 0.25                    | 0.26  |
|                  | Rhone  | 1.65        | 1.62   | 0.45                    | 0.46  |
|                  | Po     | 0.09        | 0.09   | 0.04                    | 0.04  |
|                  | Danube | 0.13        | 0.13   | 0.05                    | 0.05  |
| $M_s$ [ $km^3$ ] | CH     | 3.65        | 3.60   | 2.82                    | 2.82  |
|                  | Rhine  | 1.13        | 1.11   | 0.93                    | 0.94  |
|                  | Rhone  | 2.23        | 2.20   | 1.59                    | 1.59  |
|                  | Po     | 0.12        | 0.12   | 0.12                    | 0.12  |
|                  | Danube | 0.17        | 0.17   | 0.17                    | 0.17  |
| $B_a$ [ $m$ ]    | CH     | -3.2        | -3.1   | -0.8                    | -0.8  |
| $B_w$ [ $m$ ]    | CH     | +1.0        | +1.0   | 1.5                     | +1.2  |
| $B_s$ [ $m$ ]    | CH     | -4.2        | -4.1   | -2.3                    | -2.0  |

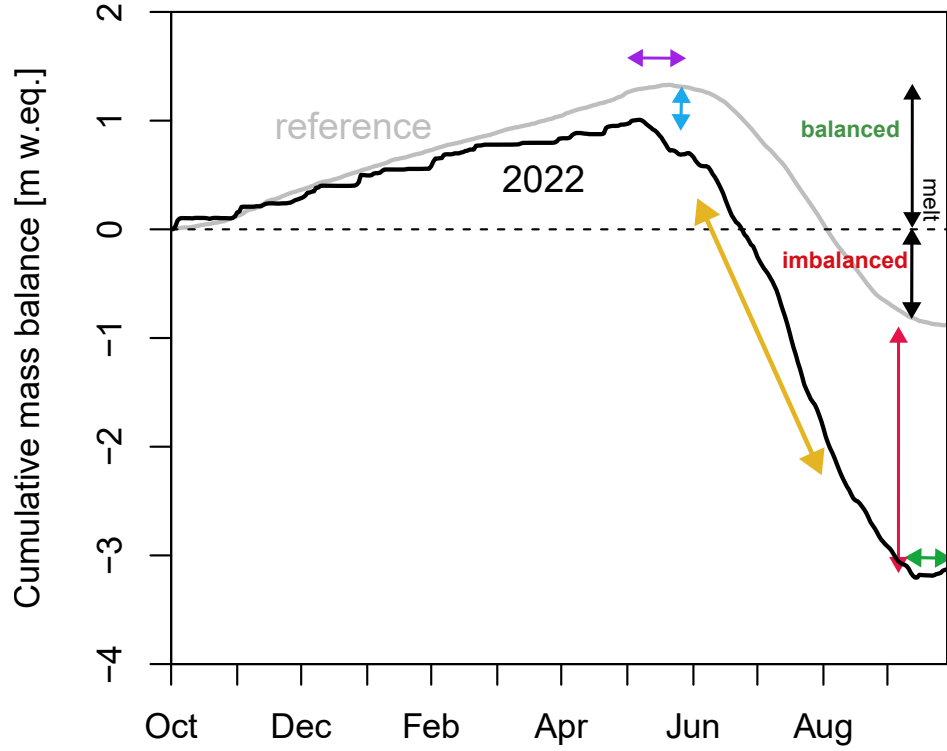

Figure S4: Schematic of the glacier mass balance attribution, with the colors referring to the boxplots in Fig. 3 of the main text. The lines refer to the reference (1991-2020) and 2022 cumulative mass balance time series. The blue and red arrows indicate the anomalies in winter and summer anomalies, respectively (Fig. 3a), the purple, green and yellow arrows to the anomaly in starting, end and intensity of the melt season (Fig 3b) and the black arrows indicate the part of melt that is balanced and imbalanced (Fig 3c).

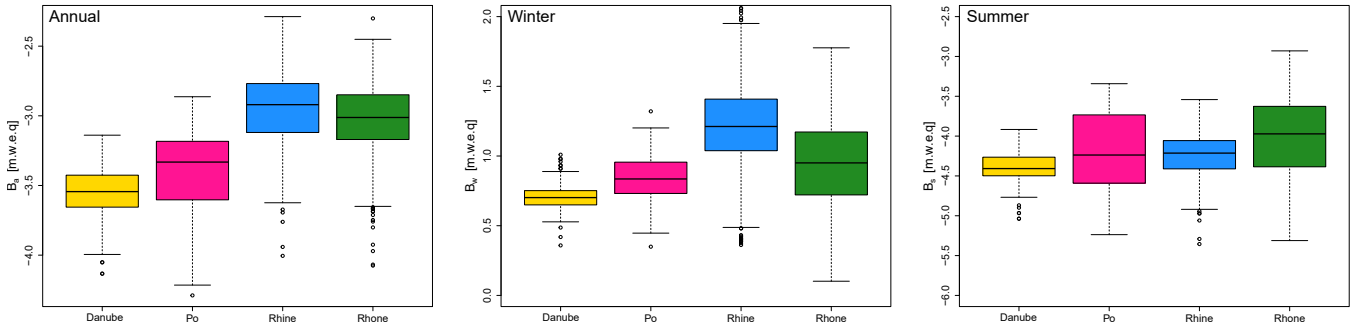

Figure S5: Distribution of glacier specific annual, winter and summer mass balances in 2022 for the four main basins.

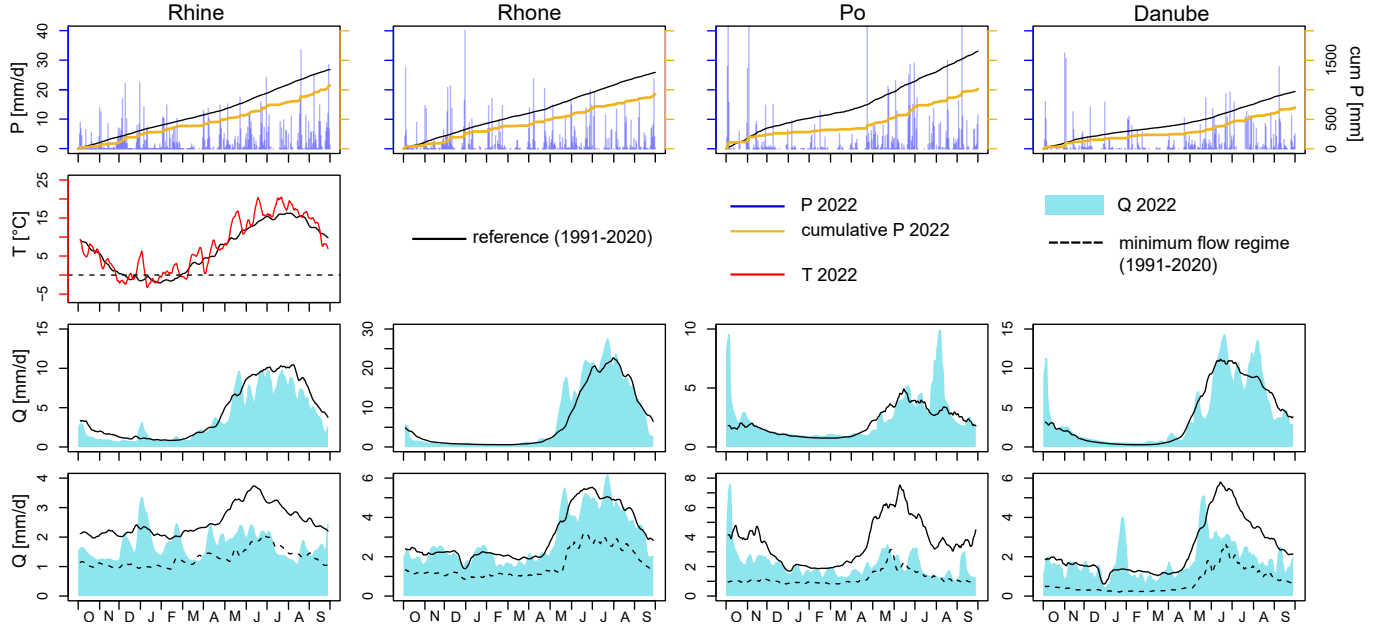

Figure S6: Precipitation (first row), temperature (second row) and the hydrological regimes of up (third row)- and downstream (fourth row) catchments in the four main river basins Rhine, Rhone, Po and Inn (columns). The selected outlets for the hydrological regime plots are indicated on Figure 1 in the main manuscript. Since the temperature anomalies over the year 2022 are very similar across the basins, only the results for the Rhine basin are shown. Variables in row 2-4 represent 7-day moving averages. The minimum flow regime corresponds to the 7-day minimum flow for each day in the period 1991-2020.

## Hydro-meteorological conditions of 2022

In all catchments, the 2022 annual temperature anomalies were around  $+1^{\circ}\text{C}$  compared to the reference period 1991-2020. For 20% of the catchments, mostly located in the southern part of Switzerland, 2022 ranks first for annual mean temperatures, based on the period 1961-2022. For all other catchments, 2022 was either the second, or third hottest year (after 2020 and 2007). The summer (JJA) of 2022 was the hottest for 18% of the catchments, whereas for the other catchments it ranked second after the summer of 2003. The summer temperature anomaly ranged between  $+1.8$  and  $+2.7^{\circ}\text{C}$ . At a monthly scale, especially, May, June and July stood out, with monthly temperature anomalies of  $+3^{\circ}\text{C}$  (Figure SI S6). May temperatures rank first for all catchments for the observation period 1961-2022. Specific sub-monthly periods of relative high temperatures occurred end of December and beginning of January, in March, May, June and July of the hydrological year 2022.

Annual precipitation amounts were 17 to 40% lower than the reference period, with the highest deficits for catchments in the Po basin (Figure SI S6). Especially the winter period stood out, with deficits up to 50% for catchments in the Po basin. Catchments in the Rhine basin showed the smallest deficits in winter ranging between 20-35%. In summer, the precipitation deficits ranged between 15 and 40% with less differences between the basins. The months with the highest deficits were March (mean deficit of 80% across all catchments), followed by January (59%), October (47%), July (46%) and May (41%). Periods without precipitation ( $<1\text{ mm/d}$ ) for at least 10 days occurred several times in winter (in October, December, January, the whole month of March) and in Spring (April). During the summer, all catchments experienced a two-week dry period from around 5-19 July.

Over the whole spring and summer, streamflow was much below normal for the Rhine basin, with lowest flows occurring around mid-August. For the Rhone basin, flows were fluctuating because of reservoir operations, but were in general close to normal conditions. Similar short-term streamflow fluctuations are observable for the downstream reaches of the Po and Inn basins, but from April onward (Po basin) and June onward (Inn basin) streamflow was much lower than normal. Upstream, especially in the Rhone basin, streamflow was higher than normal, except for September. For other upstream catchments, streamflow was close to normal conditions, with higher flow periods in May and June in the Rhine upstream catchment, in May, June and July for the Rhone catchment, and in June, July and August for the Inn upstream catchment. The upstream catchment of the Po basin only showed a relative high flow at the end of July/beginning of August (Figure S6).



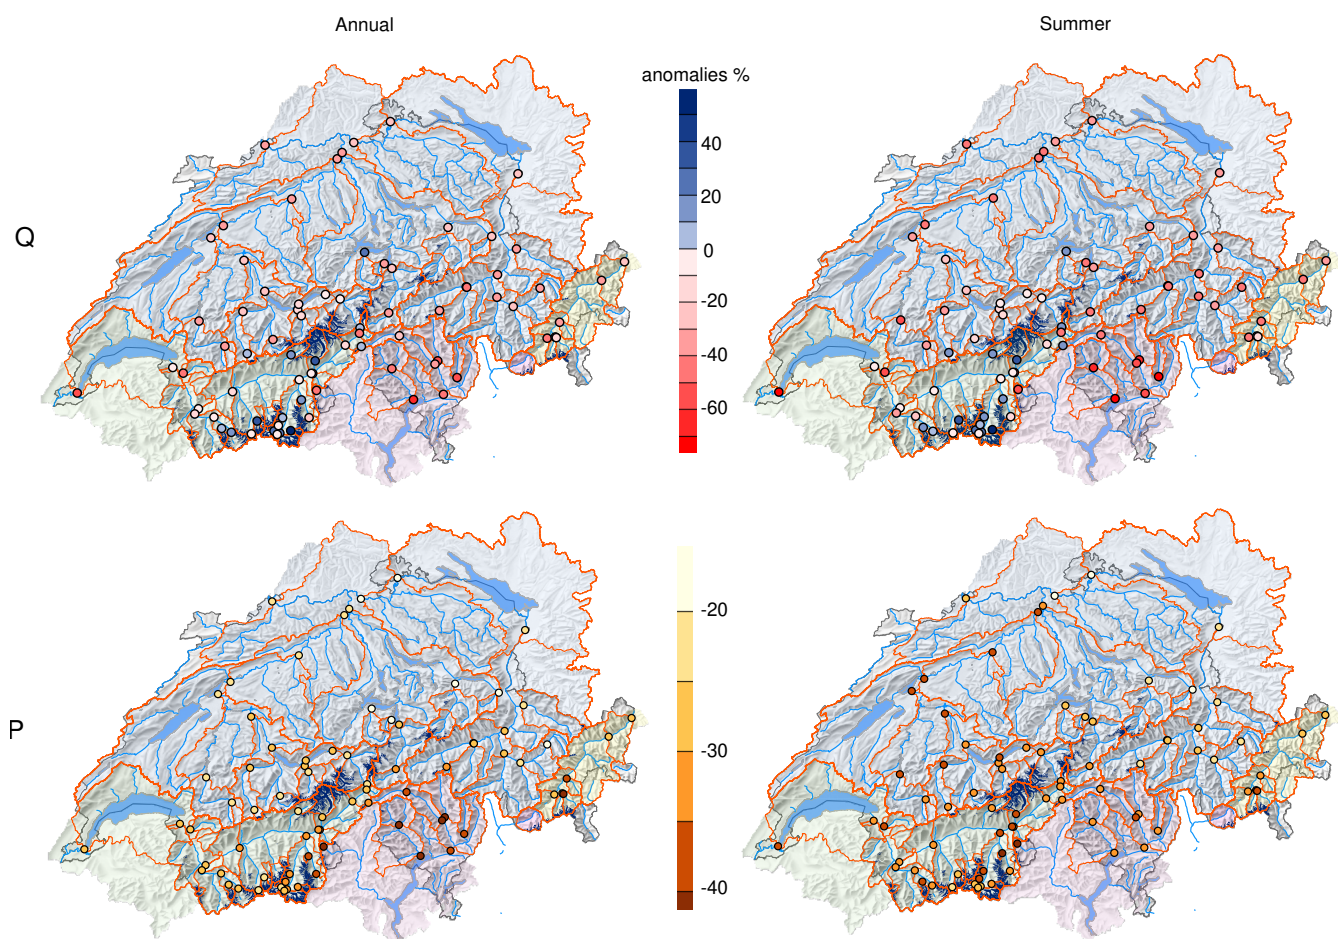

Figure S7: Relative anomalies of streamflow (top row) and precipitation (bottom row) in 2022 compared to the reference period 1991-2020, for annual (left column) and summer (right column) timescale for all catchments (dots).



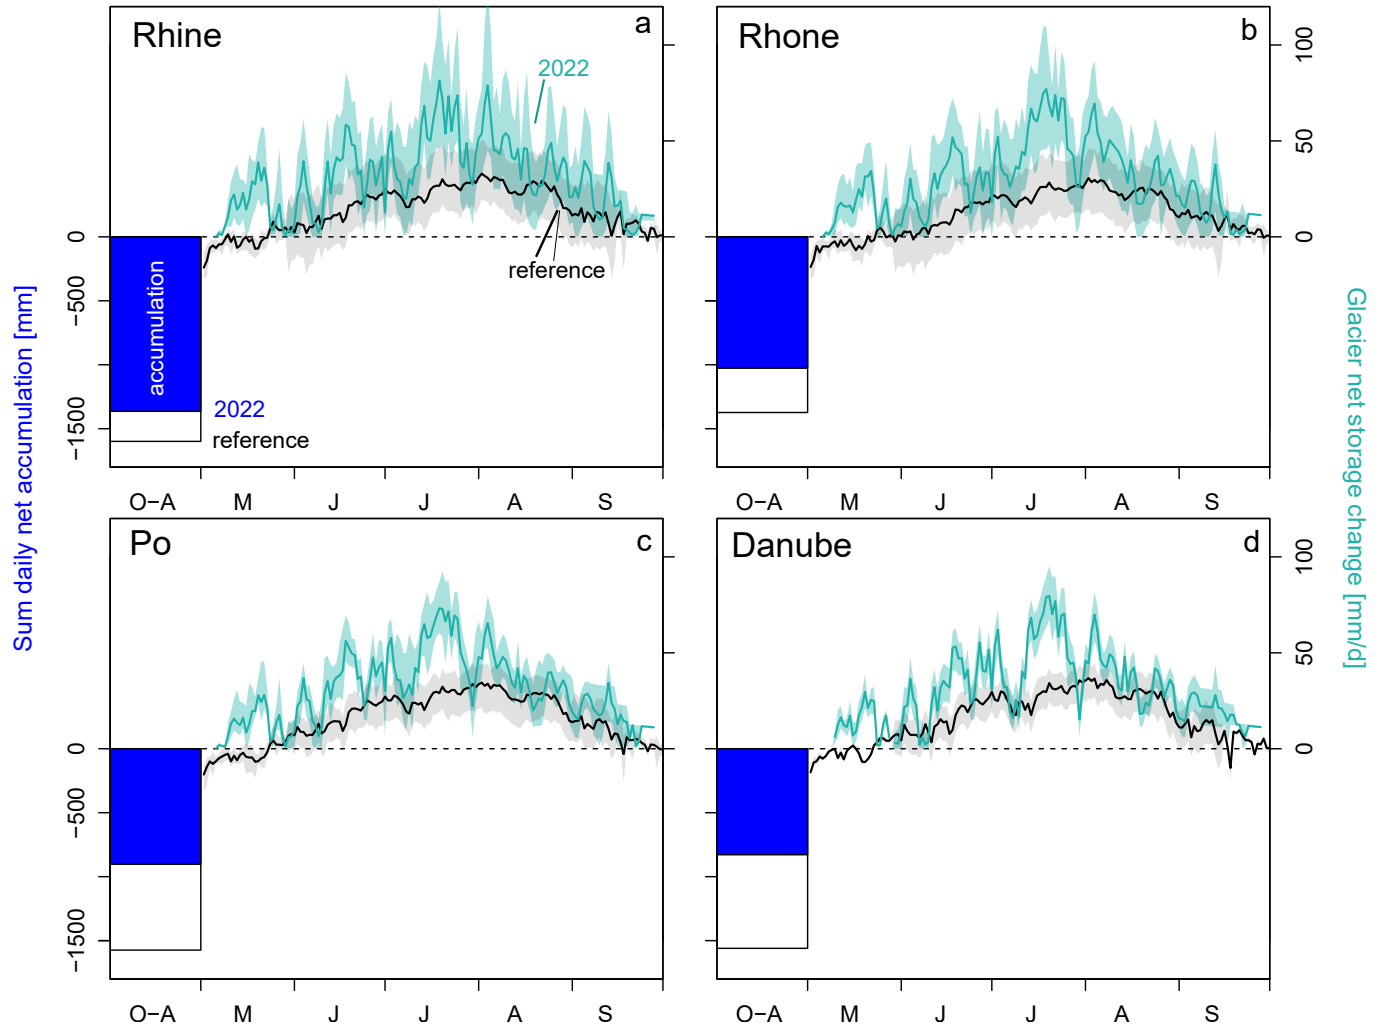

Figure S8: Daily glacier storage changes for 2022 for all glaciers in the four considered main basins expressed as glacier-specific values. The thick lines represents the mean signal while the shaded area shows the min/max range for individual glaciers. Here we switched the signs of the glacier storage change values, with positive values representing storage release and melt contributions, while negative values represent glacier storage increase and accumulation. The latter is represented by the bar plot, aggregating the accumulation season from October-April, with the reference value represented by the empty bar, and the values of 2022 by the filled blue bar.

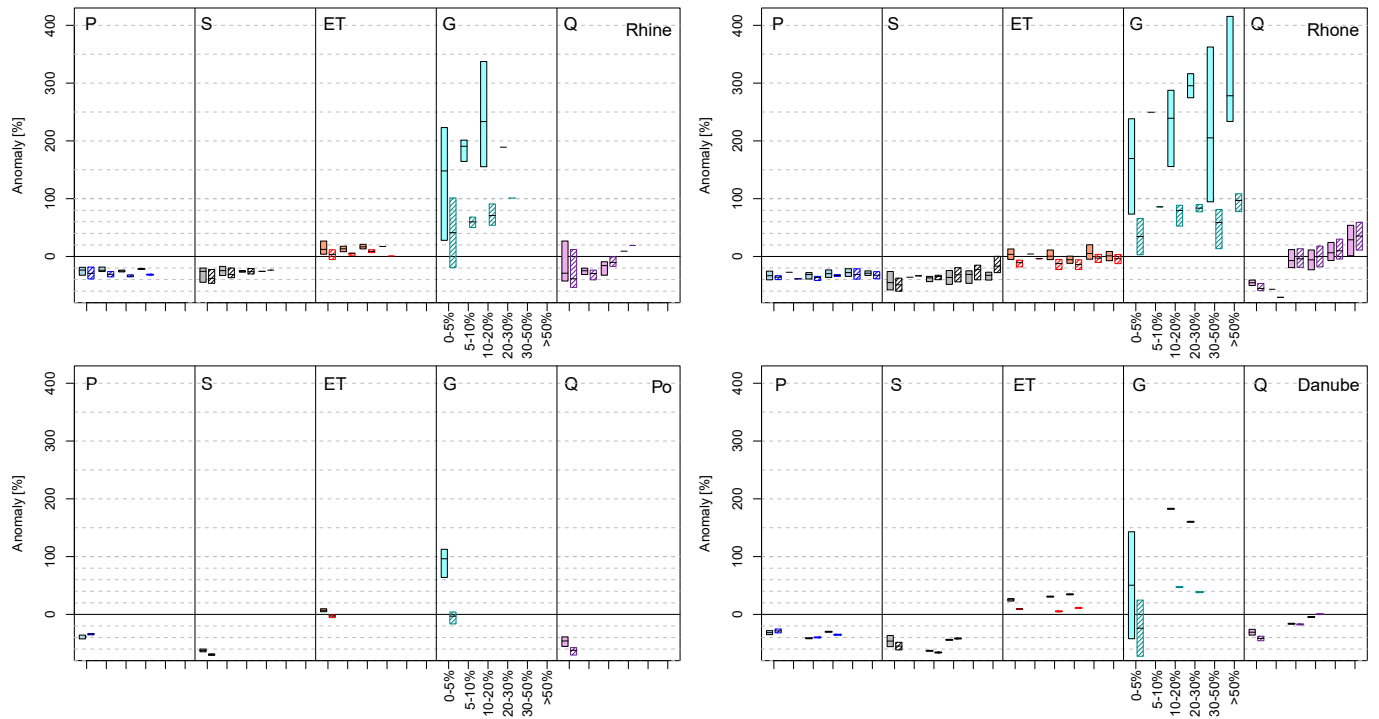

Figure S9: Water balance anomalies for the four basins, with grouping of catchments according to glacierization, similar to Figure 4 in the main text, but here the boxes indicate the relative anomalies, instead of the absolute ones that are presented in the main text. The top and bottom of the bars refer to the min and max of each glacierization class, while the black horizontal line in the middle refers to the average. The filled bars show annual anomalies, while the dashed bar shows summer anomalies.

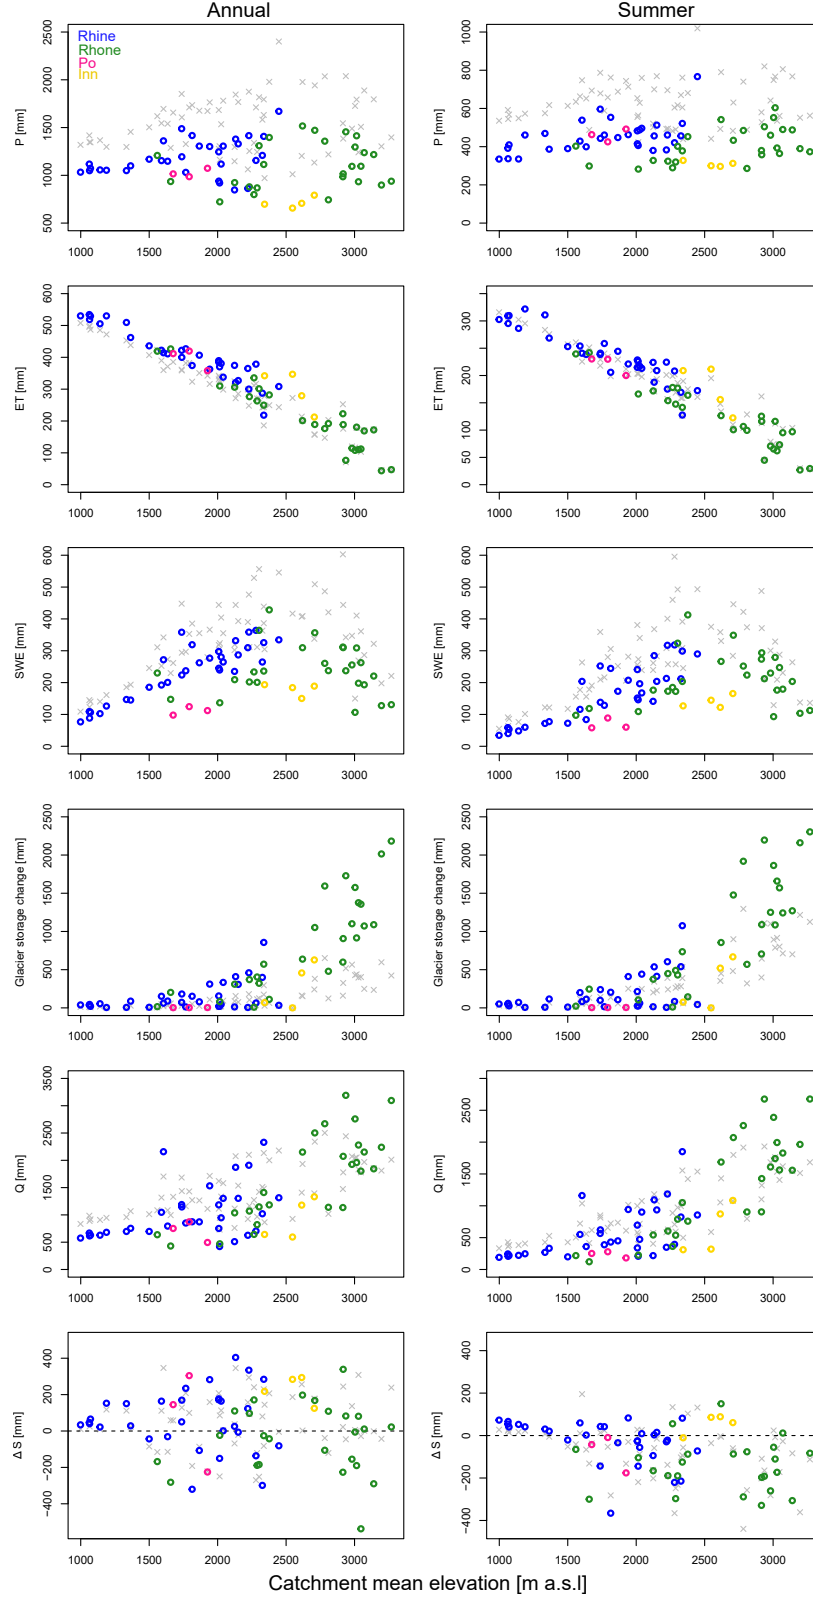

Figure S10: Water balance components for all catchments for the reference period (average of 1991-2020, gray crosses) and for 2022 (colors). Left column are annual values, while the right column shows the variables for the summer period (MJJA). Catchments are sorted according to catchment mean elevation (x-axis).  $\Delta S$  refers to the storage term in the water balance.

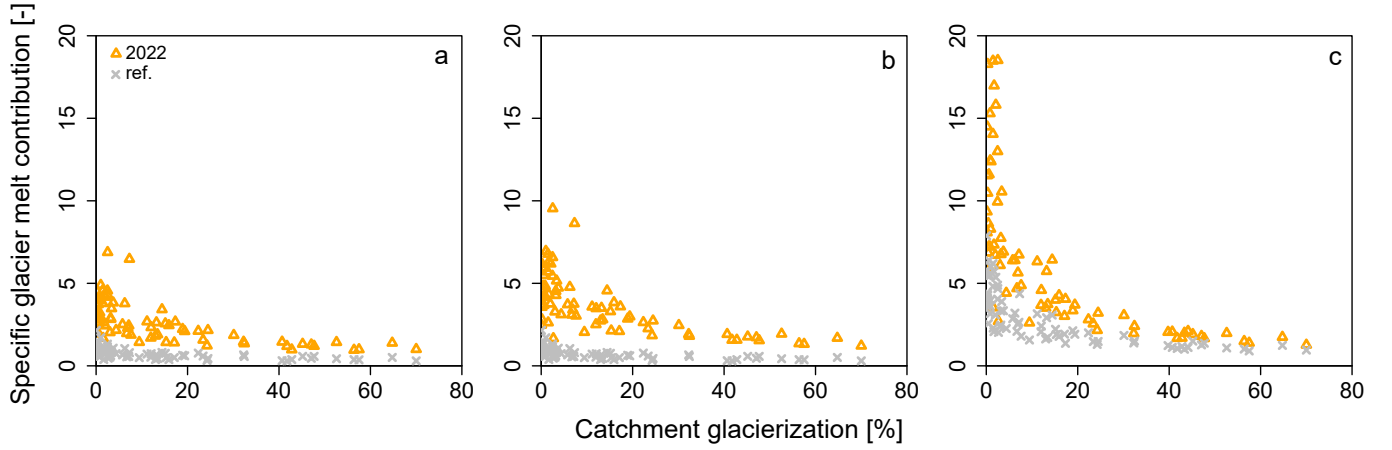

Figure S11: Specific glacier melt contributions to streamflow for a) imbalanced melt to annual streamflow, b) total melt to annual streamflow, and c) summer melt to summer streamflow. Specific contribution is here defined as the relative glacier melt contribution divided by the catchment relative glacier cover.

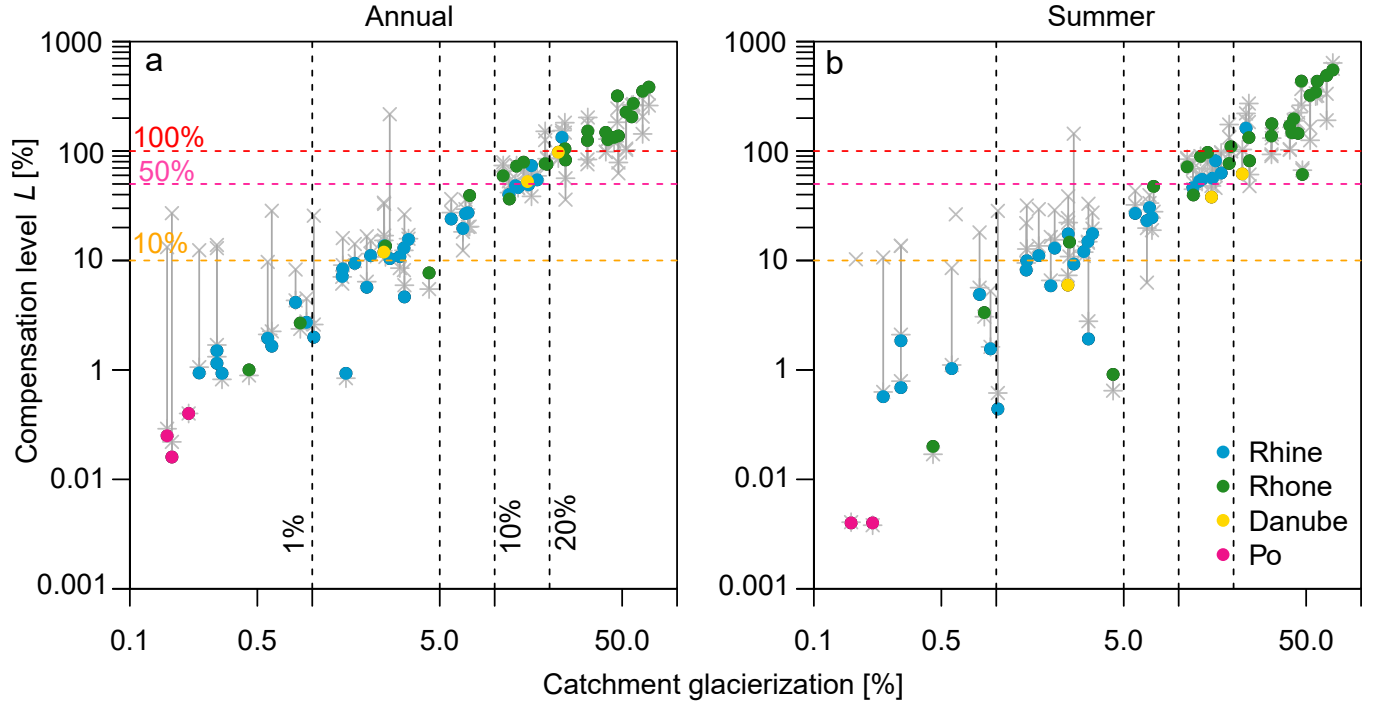

Figure S12: Similar as Fig. 5 in the main text, but without the y-axis as log-scale. Glacier compensation level  $L$  against glacierization for annual (left) and summer (MJJA; right) periods. The gray bars indicate the range of uncertainty in  $L$  due to non-closing water balance anomalies of some catchments. Since the uncertain term in the water balance is not known, the crosses indicate the water balance anomaly rest-term added to glacier surplus term, and the asterisk indicate  $L$  when the rest term is added to deficit terms (Section 4.3).

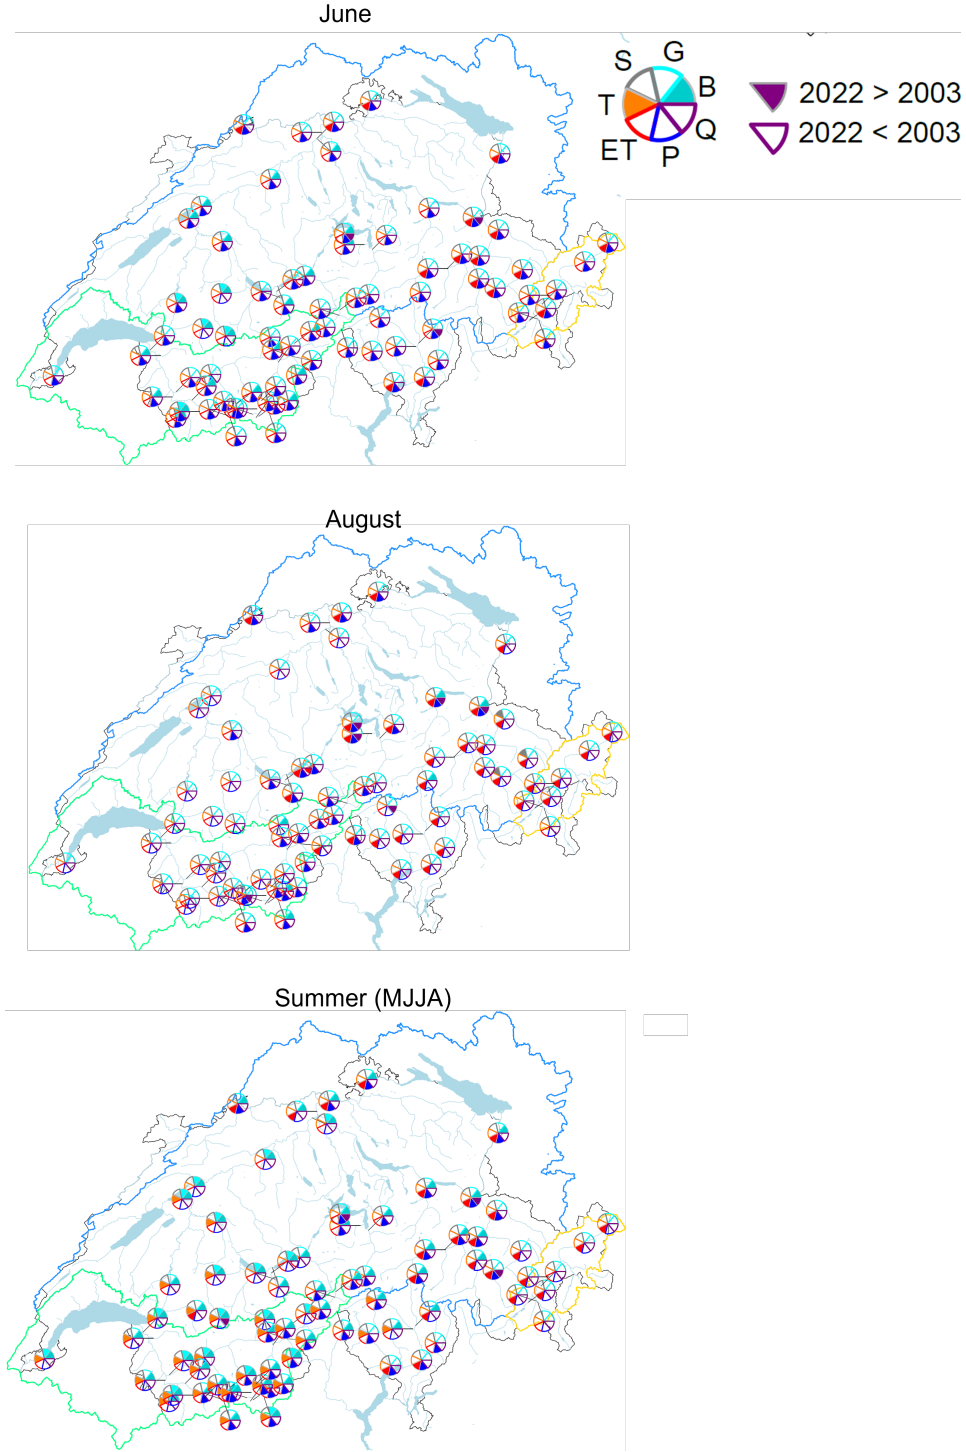

Figure S13: Similar as Fig. 8 in the main text. Comparison of glacio-hydrological variables in June, August and over the summer between 2003 and 2022 at the catchment scale (76 catchments). Closed pie parts indicate that a given variable was higher (more (melt) water or warmer) in 2022 than in 2003, and vice versa for the open pie parts. T refers to the positive degree day sum, S to the change in SWE over July as proxy for snowmelt, G to the glacier meltwater volume, B the specific glacier melt rate (mass balance), and ET, P, and Q refer to the sum of evapotranspiration, precipitation and streamflow, respectively.

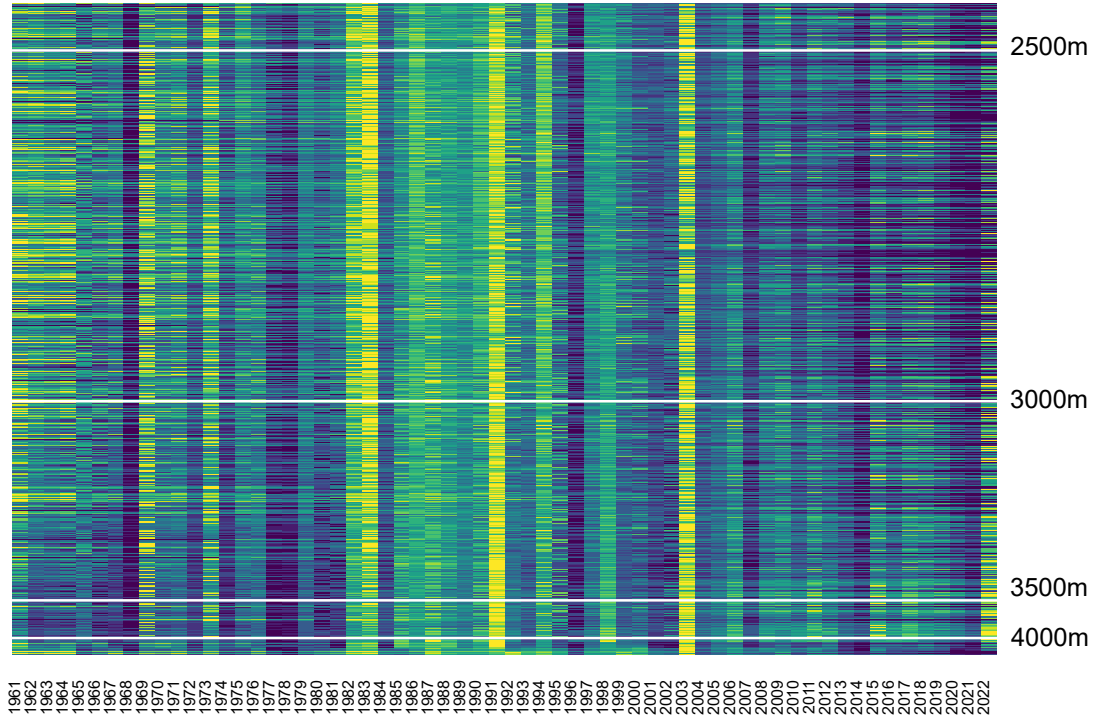

Figure S14: Similar as Fig. 9 in the main text. Glacier melt sensitivity  $\theta$  for each of the 1400 glaciers (rows), from 1961 to 2022 (columns). Here, the glaciers are sorted by elevation instead of glacier size, as in Fig. 9. Yellow indicates high sensitivity, whereas blue indicates low sensitivity.
